# Supplementary material for: Determining Conditions for Successful Culture of Multi-Cellular 3D Tumour Spheroids to Investigate the Effect of Mesenchymal Stem Cells on Breast Cancer Cell Invasiveness
Source: MDPI journal article supplement (doi:10.3390/bioengineering6040101), 2019-11-01
Supplement: s1 [file s1]

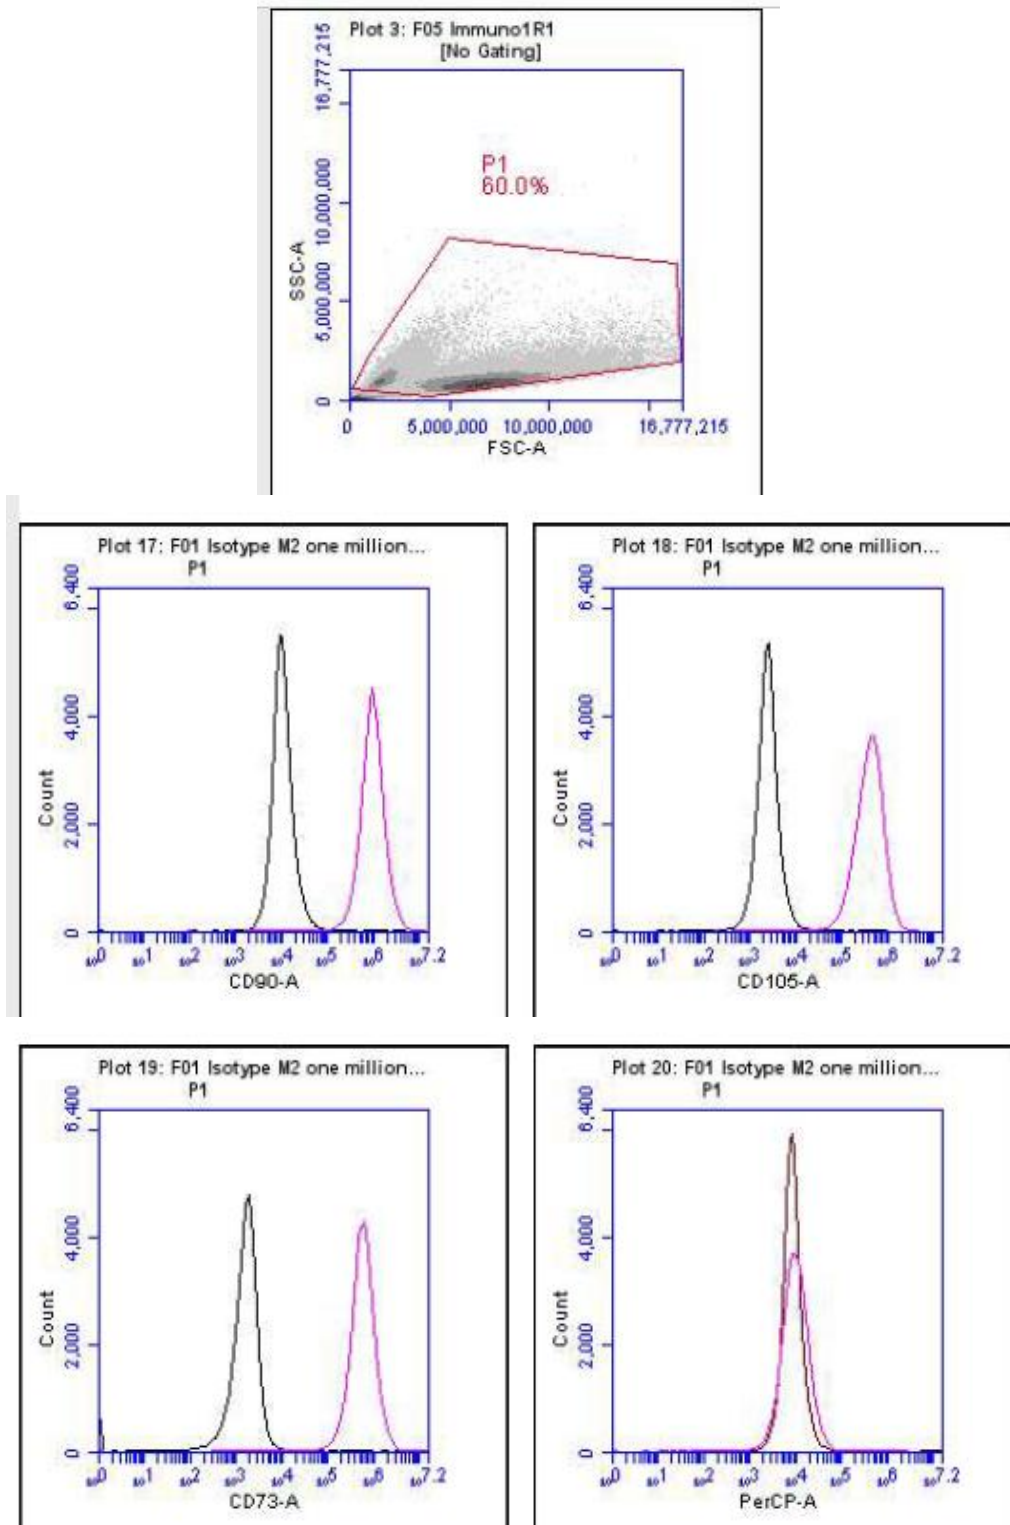

**Figure S1: Verification of MSC identity by analysis of MSC marker expression.** hBM-MSCs were stained for CD105 linked to PE, CD90 linked to FITC and CD73 linked to APC. Negative markers also stained for included CD14, CD20, CD34, CD45 and HLA-DR which were all linked to PerCP. The cells demonstrate the expected phenotype for hBM-MSCs (positive expression of CD105, CD90 and CD73, and negative expression of CD14, CD20, CD34, CD45 and HLA-DR).
